# Supplementary material
Source: PubMed Central journal article supplement (PMC3245207)
Supplement: supp_blood-2011-02-338434_Document1.pdf [file supp_blood-2011-02-338434_Document1.pdf]

Table S1. Significantly upregulated genes in LMP2A/λ-MYC pretumor B cells

| Symbol        | Definition                                                                                                                             | Fold change | p-value  | false discovery rate |
|---------------|----------------------------------------------------------------------------------------------------------------------------------------|-------------|----------|----------------------|
| Tubb6         | tubulin, beta 6 (Tubb6)                                                                                                                | 7.2761      | 9.28E-06 | 0.0070               |
| Nfkbid        | nuclear factor of kappa light polypeptide gene enhancer in B-cells inhibitor, delta (Nfkbid)                                           | 5.5403      | 4.53E-07 | 0.0013               |
| Gpr176        | G protein-coupled receptor 176 (Gpr176)                                                                                                | 4.5664      | 1.23E-07 | 0.0004               |
| Reln          | reelin (Reln)                                                                                                                          | 4.0695      | 9.42E-07 | 0.0019               |
| Rhbdf1        | rhomboid family 1 (Drosophila) (Rhbdf1)                                                                                                | 3.3097      | 2.66E-05 | 0.0095               |
| Foxf2         | forkhead box F2 (Foxf2)                                                                                                                | 3.2704      | 1.56E-06 | 0.0021               |
| Ehd3          | EH-domain containing 3 (Ehd3)                                                                                                          | 3.0876      | 3.33E-08 | 0.0003               |
| Egr1          | early growth response 1 (Egr1)                                                                                                         | 2.9477      | 3.26E-05 | 0.0102               |
| Gramd3        | GRAM domain containing 3 (Gramd3)                                                                                                      | 2.9327      | 5.38E-04 | 0.0383               |
| Slc27a3       | solute carrier family 27 (fatty acid transporter), member 3                                                                            | 2.8373      | 3.91E-04 | 0.0318               |
| Ryk           | receptor-like tyrosine kinase (Ryk), transcript variant 2                                                                              | 2.8041      | 7.15E-06 | 0.0060               |
| Acaa2         | acetyl-Coenzyme A acyltransferase 2 (mitochondrial 3-oxoacyl-Coenzyme A thiolase) (Acaa2), nuclear gene encoding mitochondrial protein | 2.7839      | 2.33E-04 | 0.0256               |
| Cd69          | CD69 antigen (Cd69)                                                                                                                    | 2.5919      | 6.61E-05 | 0.0122               |
| 6430550H21Rik | RIKEN cDNA 6430550H21 gene (6430550H21Rik)                                                                                             | 2.5138      | 2.88E-04 | 0.0290               |
| Glipr2        | GLI pathogenesis-related 2 (Glipr2)                                                                                                    | 2.4801      | 3.37E-04 | 0.0309               |
| Ebi3          | Epstein-Barr virus induced gene 3 (Ebi3)                                                                                               | 2.4276      | 3.08E-04 | 0.0302               |
| Asns          | asparagine synthetase (Asns)                                                                                                           | 2.3896      | 5.49E-04 | 0.0383               |
| Dlk1          | delta-like 1 homolog (Drosophila) (Dlk1)                                                                                               | 2.2525      | 1.63E-04 | 0.0212               |
| Chst7         | carbohydrate (N-acetylglucosamino) sulfotransferase 7 (Chst7)                                                                          | 2.2365      | 1.96E-05 | 0.0087               |
| Gng10         | guanine nucleotide binding protein (G protein), gamma 10 (Gng10)                                                                       | 2.1966      | 3.47E-05 | 0.0105               |
| Slc2a6        | solute carrier family 2 (facilitated glucose transporter), member 6 (Slc2a6)                                                           | 2.1744      | 2.03E-04 | 0.0245               |
| Adarb1        | adenosine deaminase, RNA-specific, B1 (Adarb1), transcript variant 1                                                                   | 2.1662      | 5.48E-05 | 0.0114               |
| Lrig3         | leucine-rich repeats and immunoglobulin-like domains 3 (Lrig3)                                                                         | 2.1424      | 1.26E-04 | 0.0182               |
| Zfhx3         | zinc finger homeobox 3 (Zfhx3)                                                                                                         | 2.1011      | 3.77E-05 | 0.0108               |
| Ets2          | E26 avian leukemia oncogene 2, 3' domain (Ets2)                                                                                        | 2.0975      | 6.82E-05 | 0.0123               |
| Zmat3         | zinc finger matrin type 3 (Zmat3)                                                                                                      | 2.0682      | 1.77E-04 | 0.0224               |
| Gpx7          | glutathione peroxidase 7 (Gpx7)                                                                                                        | 2.0619      | 5.14E-05 | 0.0113               |
| Ruvbl1        | RuvB-like protein 1 (Ruvbl1)                                                                                                           | 2.0402      | 7.79E-04 | 0.0455               |
| Ahnak         | AHNAK nucleoprotein (desmoyokin) (Ahnak), transcript variant 1                                                                         | 2.0390      | 5.40E-04 | 0.0383               |
| Stac          | src homology three (SH3) and cysteine rich domain (Stac)                                                                               | 2.0150      | 2.42E-04 | 0.0262               |
| Casp4         | caspase 4, apoptosis-related cysteine peptidase (Casp4)                                                                                | 2.0036      | 8.19E-04 | 0.0463               |
| Tmem33        | transmembrane protein 33 (Tmem33), transcript variant 2                                                                                | 1.9981      | 2.81E-04 | 0.0288               |
| Lysmd2        | LysM, putative peptidoglycan-binding, domain containing 2 (Lysmd2)                                                                     | 1.9601      | 2.09E-05 | 0.0088               |
| Evi5          | ecotropic viral integration site 5 (Evi5)                                                                                              | 1.9329      | 4.87E-04 | 0.0375               |
| Mapk12        | mitogen-activated protein kinase 12 (Mapk12)                                                                                           | 1.9183      | 1.78E-06 | 0.0021               |
| D12Ert553e    | DNA segment, Chr 12, ERATO Doi 553, expressed (D12Ert553e)                                                                             | 1.9131      | 2.44E-05 | 0.0094               |
| Alg5          | asparagine-linked glycosylation 5 homolog (yeast, dolichyl-phosphate beta-glucosyltransferase) (Alg5)                                  | 1.8984      | 4.23E-04 | 0.0332               |
| Prr7          | proline rich 7 (synaptic) (Prr7)                                                                                                       | 1.8955      | 9.53E-05 | 0.0149               |
| LOC233529     |                                                                                                                                        | 1.8953      | 7.95E-04 | 0.0459               |
| Cebpb         | CCAAT/enhancer binding protein (C/EBP), beta (Cebpb)                                                                                   | 1.8699      | 7.57E-04 | 0.0451               |
| Tmem49        | transmembrane protein 49 (Tmem49)                                                                                                      | 1.8455      | 7.17E-04 | 0.0441               |
| Cd80          | CD80 antigen (Cd80)                                                                                                                    | 1.8391      | 1.76E-05 | 0.0084               |
| Cdc14b        | CDC14 cell division cycle 14 homolog B (S. cerevisiae) (Cdc14b)                                                                        | 1.8206      | 1.03E-04 | 0.0158               |
| Uba1          | ubiquitin-like modifier activating enzyme 1 (Uba1)                                                                                     | 1.8190      | 3.29E-04 | 0.0308               |
| Rin3          | Ras and Rab interactor 3 (Rin3)                                                                                                        | 1.7937      | 7.85E-04 | 0.0455               |
| Nt5e          | 5' nucleotidase, ecto (Nt5e)                                                                                                           | 1.7728      | 6.89E-05 | 0.0123               |
| Rps6kl1       | ribosomal protein S6 kinase-like 1 (Rps6kl1)                                                                                           | 1.7687      | 1.76E-04 | 0.0224               |
| Bag3          | BCL2-associated athanogene 3 (Bag3)                                                                                                    | 1.7406      | 1.56E-04 | 0.0207               |

|               |                                                                                                           |        |          |        |
|---------------|-----------------------------------------------------------------------------------------------------------|--------|----------|--------|
| Fcgr2b        | Fc receptor, IgG, low affinity IIb (Fcgr2b), transcript variant 1                                         | 1.7341 | 6.72E-04 | 0.0431 |
| Sas           | Sarcoma-amplified sequence (Sas)                                                                          | 1.7179 | 4.22E-04 | 0.0332 |
| Smpd13b       | sphingomyelin phosphodiesterase, acid-like 3B (Smpd13b)                                                   | 1.7128 | 3.02E-05 | 0.0098 |
| Rrp1b         | ribosomal RNA processing 1 homolog B ( <i>S. cerevisiae</i> ) (Rrp1b)                                     | 1.7074 | 6.88E-04 | 0.0436 |
| Wrb           | tryptophan rich basic protein (wrb)                                                                       | 1.6765 | 6.11E-04 | 0.0409 |
| Kctd14        | potassium channel tetramerisation domain containing 14 (Kctd14)                                           | 1.6612 | 2.36E-04 | 0.0258 |
| Nme7          | non-metastatic cells 7, protein expressed in (nucleoside-diphosphate kinase) (Nme7), transcript variant 1 | 1.6509 | 4.29E-04 | 0.0334 |
| Amd2          | S-adenosylmethionine decarboxylase 2 (Amd2)                                                               | 1.6480 | 7.07E-04 | 0.0440 |
| Krr1          | KRR1, small subunit (SSU) processome component, homolog (yeast) (Krr1)                                    | 1.6468 | 7.08E-04 | 0.0440 |
| Wnt10b        | wingless related MMTV integration site 10b (Wnt10b)                                                       | 1.6459 | 7.11E-04 | 0.0440 |
| Tnfaip3       | tumor necrosis factor, alpha-induced protein 3 (Tnfaip3)                                                  | 1.6330 | 7.85E-04 | 0.0455 |
| Tlr2          | toll-like receptor 2 (Tlr2)                                                                               | 1.6326 | 5.38E-04 | 0.0383 |
| Tmed3         | transmembrane emp24 domain containing 3 (Tmed3)                                                           | 1.6311 | 4.82E-05 | 0.0113 |
| Spire1        | spire homolog 1 ( <i>Drosophila</i> ) (Spire1), transcript variant 2                                      | 1.6306 | 2.84E-04 | 0.0288 |
| Cd86          | CD86 antigen (Cd86)                                                                                       | 1.6260 | 1.54E-04 | 0.0206 |
| Rassf4        | Ras association (RalGDS/AF-6) domain family member 4 (Rassf4)                                             | 1.6144 | 5.96E-04 | 0.0403 |
| Trub1         | TruB pseudouridine (psi) synthase homolog 1 ( <i>E. coli</i> ) (Trub1), transcript variant 1              | 1.5861 | 3.65E-04 | 0.0316 |
| Aldh3b1       | aldehyde dehydrogenase 3 family, member B1 (Aldh3b1)                                                      | 1.5645 | 5.39E-04 | 0.0383 |
| Mpp6          | membrane protein, palmitoylated 6 (MAGUK p55 subfamily member 6) (Mpp6)                                   | 1.5542 | 1.67E-05 | 0.0084 |
| Lrp11         | low density lipoprotein receptor-related protein 11 (Lrp11)                                               | 1.5538 | 2.93E-05 | 0.0097 |
| Sh3bgrl2      | SH3 domain binding glutamic acid-rich protein like 2 (Sh3bgrl2)                                           | 1.5504 | 3.23E-04 | 0.0308 |
| Cdkn2a        | cyclin-dependent kinase inhibitor 2A (Cdkn2a), transcript variant 1                                       | 1.5485 | 1.33E-05 | 0.0083 |
| Cdc42bbp      | CDC42 binding protein kinase beta (Cdc42bbp)                                                              | 1.5456 | 3.88E-04 | 0.0318 |
| LOC100046608  | PREDICTED: <i>Mus musculus</i> similar to Bcl2-like protein (LOC100046608)                                | 1.5320 | 5.47E-04 | 0.0383 |
| Dctd          | dCMP deaminase (Dctd)                                                                                     | 1.5312 | 5.63E-05 | 0.0115 |
| BC048355      | cDNA sequence BC048355                                                                                    | 1.5300 | 9.22E-04 | 0.0495 |
| Arl5c         | ADP-ribosylation factor-like 5C (Arl5c)                                                                   | 1.5262 | 3.76E-04 | 0.0316 |
| Gpr120        | G protein-coupled receptor 120 (Gpr120)                                                                   | 1.5202 | 7.51E-04 | 0.0451 |
| 2700062C07Rik | RIKEN cDNA 2700062C07 gene (2700062C07Rik)                                                                | 1.5171 | 8.44E-04 | 0.0468 |

Table S2. Significantly downregulated genes in LMP2A/λ-MYC pretumor B cells

| Symbol        | Definition                                                                        | Fold change | p-value  | false discovery rate |
|---------------|-----------------------------------------------------------------------------------|-------------|----------|----------------------|
| Vpreb1        | pre-B lymphocyte gene 1 (Vpreb1)                                                  | -7.7424     | 6.13E-05 | 0.0120               |
| Rsph1         | radial spoke head 1 homolog (Chlamydomonas) (Rsph1)                               | -7.4494     | 3.65E-06 | 0.0033               |
| Myl4          | myosin, light polypeptide 4 (Myl4)                                                | -3.8564     | 5.12E-05 | 0.0113               |
| Tnfrsf19      | tumor necrosis factor receptor superfamily, member 19 (Tnfrsf19)                  | -3.2686     | 6.08E-05 | 0.0120               |
| Atp1b1        | ATPase, Na <sup>+</sup> /K <sup>+</sup> transporting, beta 1 polypeptide (Atp1b1) | -3.2529     | 1.57E-05 | 0.0083               |
| Il7r          | interleukin 7 receptor (Il7r)                                                     | -3.1715     | 7.84E-05 | 0.0135               |
| Bach2         | BTB and CNC homology 2 (Bach2)                                                    | -3.0149     | 3.90E-05 | 0.0109               |
| Laptm5        | lysosomal-associated protein transmembrane 5 (Laptm5)                             | -2.9751     | 3.59E-04 | 0.0316               |
| Tmem132e      | transmembrane protein 132E (Tmem132e)                                             | -2.9319     | 3.20E-06 | 0.0031               |
| Tes           | testis derived transcript (Tes), transcript variant 1                             | -2.8828     | 4.60E-08 | 0.0003               |
| Elovl6        | ELOVL family member 6, elongation of long chain fatty acids (yeast) (Elovl6)      | -2.8645     | 2.92E-05 | 0.0097               |
| Sertad4       | SERTA domain containing 4 (Sertad4)                                               | -2.8603     | 9.04E-06 | 0.0070               |
| Btrc          | beta-transducin repeat containing protein (Btrc), transcript variant 1            | -2.8491     | 1.32E-04 | 0.0186               |
| Satb1         | special AT-rich sequence binding protein 1 (Satb1)                                | -2.7133     | 4.15E-05 | 0.0112               |
| Plcd3         | phospholipase C, delta 3 (Plcd3)                                                  | -2.6771     | 9.95E-06 | 0.0071               |
| 1700027N10Rik | RIKEN cDNA 1700027N10 gene (1700027N10Rik)                                        | -2.6412     | 4.24E-05 | 0.0112               |
| Zcchc18       | zinc finger, CCHC domain containing 18 (Zcchc18), transcript variant 3            | -2.5319     | 7.19E-08 | 0.0003               |
| Emid1         | EMI domain containing 1 (Emid1)                                                   | -2.4252     | 2.43E-04 | 0.0262               |
| Marcks        | myristoylated alanine rich protein kinase C substrate (Marcks)                    | -2.3969     | 5.43E-05 | 0.0114               |
| Hvcn1         | hydrogen voltage-gated channel 1 (Hvcn1)                                          | -2.3613     | 7.25E-05 | 0.0127               |
| Dntt          | deoxynucleotidyltransferase, terminal (Dntt), transcript variant 2                | -2.3599     | 6.27E-04 | 0.0412               |
| Arpp21        | cyclic AMP-regulated phosphoprotein, 21 (Arpp21), transcript variant 2            | -2.3511     | 2.24E-04 | 0.0256               |
| D230007K08Rik | PREDICTED: RIKEN cDNA D230007K08 gene, transcript variant 5 (D230007K08Rik)       | -2.3456     | 1.75E-06 | 0.0021               |
| Fgf13         | fibroblast growth factor 13 (Fgf13)                                               | -2.3338     | 1.56E-05 | 0.0083               |
| Ell3          | elongation factor RNA polymerase II-like 3 (Ell3)                                 | -2.3034     | 2.01E-05 | 0.0087               |
| 9630015D15Rik | RIKEN cDNA 9630015D15 gene (9630015D15Rik)                                        | -2.2662     | 6.24E-04 | 0.0412               |
| Palm          | paralemmin (Palm)                                                                 | -2.2504     | 8.77E-05 | 0.0142               |
| Islr2         | immunoglobulin superfamily containing leucine-rich repeat 2 (Islr2)               | -2.2048     | 1.32E-05 | 0.0083               |
| 9830002I17Rik | RIKEN cDNA 9830002I17 gene (9830002I17Rik)                                        | -2.1742     | 5.13E-04 | 0.0383               |
| Hvcn1         | hydrogen voltage-gated channel 1 (Hvcn1), transcript variant 1                    | -2.1615     | 5.79E-05 | 0.0117               |
| Coq7          | demethyl-Q 7 (Coq7)                                                               | -2.1427     | 4.95E-05 | 0.0113               |
| Arntl         | aryl hydrocarbon receptor nuclear translocator-like (Arntl)                       | -2.1333     | 2.05E-04 | 0.0245               |
| Slpi          | secretory leukocyte peptidase inhibitor (Slpi)                                    | -2.1154     | 2.92E-06 | 0.0030               |
| Wwc2          | WW, C2 and coiled-coil domain containing 2 (Wwc2)                                 | -2.1105     | 6.16E-04 | 0.0410               |
| Cnp           | 2',3'-cyclic nucleotide 3' phosphodiesterase (Cnp)                                | -2.0918     | 5.30E-04 | 0.0383               |
| Axl           | AXL receptor tyrosine kinase (Axl)                                                | -2.0663     | 1.71E-04 | 0.0221               |
| Rem2          | rad and gem related GTP binding protein 2 (Rem2)                                  | -2.0658     | 4.30E-05 | 0.0112               |
| Inpp5d        | inositol polyphosphate-5-phosphatase D (Inpp5d)                                   | -2.0513     | 8.59E-05 | 0.0141               |
| Cfp           | complement factor properdin (Cfp)                                                 | -2.0184     | 1.39E-05 | 0.0083               |
| D930015E06Rik | RIKEN cDNA D930015E06 gene (D930015E06Rik)                                        | -2.0101     | 5.16E-05 | 0.0113               |
| Tmc7          | transmembrane channel-like gene family 7 (Tmc7)                                   | -2.0005     | 6.63E-04 | 0.0430               |
| Tmem108       | transmembrane protein 108 (Tmem108)                                               | -1.9843     | 1.36E-04 | 0.0188               |
| Rasgrp3       | RAS, guanyl releasing protein 3 (Rasgrp3)                                         | -1.9760     | 7.99E-04 | 0.0459               |
| Dtx1          | deltex 1 homolog (Drosophila) (Dtx1)                                              | -1.9409     | 9.55E-05 | 0.0149               |
| Zfp608        | zinc finger protein 608 (Zfp608)                                                  | -1.9343     | 1.27E-06 | 0.0021               |
| Nrarp         | Notch-regulated ankyrin repeat protein (Nrarp)                                    | -1.9133     | 1.59E-04 | 0.0209               |
| Socs2         | suppressor of cytokine signaling 2 (Socs2)                                        | -1.9105     | 5.17E-04 | 0.0383               |
| Capsl         | calcyphosine-like (Capsl)                                                         | -1.8892     | 1.70E-05 | 0.0084               |
| Fam101a       | family with sequence similarity 101, member A (Fam101a)                           | -1.8892     | 1.64E-06 | 0.0021               |
| Abi3          | ABI family member 3 (Abi3)                                                        | -1.8833     | 6.83E-04 | 0.0435               |

|               |                                                                                                             |         |          |        |
|---------------|-------------------------------------------------------------------------------------------------------------|---------|----------|--------|
| Rgs12         | regulator of G-protein signaling 12 (Rgs12)                                                                 | -1.8795 | 2.55E-05 | 0.0095 |
| Tax1bp3       | Tax1 (human T-cell leukemia virus type I) binding protein 3 (Tax1bp3)                                       | -1.8517 | 1.34E-04 | 0.0187 |
| Lxn           | latexin (Lxn)                                                                                               | -1.8513 | 3.53E-05 | 0.0105 |
| Smtn          | smoothelin (Smtn)                                                                                           | -1.8487 | 1.22E-04 | 0.0180 |
| Otub2         | OTU domain, ubiquitin aldehyde binding 2 (Otub2)                                                            | -1.8374 | 3.79E-04 | 0.0316 |
| Btrc          | beta-transducin repeat containing protein (Btrc), transcript variant 2                                      | -1.8347 | 7.71E-04 | 0.0455 |
| Serpina3g     | serine (or cysteine) peptidase inhibitor, clade A, member 3G (Serpina3g)                                    | -1.8213 | 4.30E-04 | 0.0334 |
| Sdc3          | syndecan 3 (Sdc3)                                                                                           | -1.8147 | 8.08E-04 | 0.0461 |
| Pde2a         | phosphodiesterase 2A, cGMP-stimulated (Pde2a)                                                               | -1.8130 | 4.12E-04 | 0.0328 |
| Pik3cd        | phosphatidylinositol 3-kinase catalytic delta polypeptide (Pik3cd), transcript variant 1                    | -1.7952 | 9.24E-04 | 0.0495 |
| Dpp4          | dipeptidylpeptidase 4 (Dpp4)                                                                                | -1.7768 | 2.29E-04 | 0.0256 |
| Marcksl1      | MARCKS-like 1 (Marcksl1)                                                                                    | -1.7610 | 2.23E-04 | 0.0256 |
| Skil          | SKI-like (Skil), transcript variant 2                                                                       | -1.7539 | 5.39E-04 | 0.0383 |
| Axud1         | AXIN1 up-regulated 1 (Axud1)                                                                                | -1.7426 | 8.20E-05 | 0.0139 |
| Spnb2         | spectrin beta 2 (Spnb2), transcript variant 2                                                               | -1.7370 | 1.16E-04 | 0.0174 |
| Ccr6          | chemokine (C-C motif) receptor 6 (Ccr6)                                                                     | -1.7219 | 5.22E-05 | 0.0113 |
| Fam169b       | family with sequence similarity 169, member B (Fam169b)                                                     | -1.7169 | 2.97E-04 | 0.0294 |
| Tspan6        | tetraspanin 6 (Tspan6)                                                                                      | -1.7141 | 2.92E-04 | 0.0292 |
| Pip5k1b       | phosphatidylinositol-4-phosphate 5-kinase, type 1 beta (Pip5k1b)                                            | -1.7043 | 4.10E-04 | 0.0328 |
| Stk17b        | serine/threonine kinase 17b (apoptosis-inducing) (Stk17b)                                                   | -1.6932 | 7.05E-04 | 0.0440 |
| Atp2a3        | ATPase, Ca <sup>++</sup> transporting, ubiquitous (Atp2a3)                                                  | -1.6857 | 8.81E-05 | 0.0142 |
| Abcb4         | ATP-binding cassette, sub-family B (MDR/TAP), member 4 (Abcb4)                                              | -1.6821 | 3.17E-04 | 0.0308 |
| Sord          | sorbitol dehydrogenase (Sord)                                                                               | -1.6788 | 1.42E-04 | 0.0193 |
| Ptk2b         | PTK2 protein tyrosine kinase 2 beta (Ptk2b)                                                                 | -1.6725 | 3.36E-04 | 0.0309 |
| Dyrk1b        | dual-specificity tyrosine-(Y)-phosphorylation regulated kinase 1b (Dyrk1b), transcript variant 1            | -1.6705 | 2.19E-06 | 0.0024 |
| Plekha2       | pleckstrin homology domain-containing, family A (phosphoinositide binding specific) member 2 (Plekha2)      | -1.6678 | 1.44E-05 | 0.0083 |
| Insl6         | insulin-like 6 (Insl6)                                                                                      | -1.6587 | 6.67E-05 | 0.0122 |
| Amz2          | archaelysin family metallopeptidase 2 (Amz2)                                                                | -1.6552 | 1.15E-05 | 0.0078 |
| Dusp23        | dual specificity phosphatase 23 (Dusp23)                                                                    | -1.6485 | 4.87E-05 | 0.0113 |
| Lgr5          | leucine rich repeat containing G protein coupled receptor 5 (Lgr5)                                          | -1.6437 | 2.57E-04 | 0.0271 |
| Rdm1          | RAD52 motif 1 (Rdm1)                                                                                        | -1.6433 | 3.59E-04 | 0.0316 |
| Zkscan17      | zinc finger with KRAB and SCAN domains 17 (Zkscan17)                                                        | -1.6422 | 6.46E-05 | 0.0122 |
| Smarca4       | SWI/SNF related, matrix associated, actin dependent regulator of chromatin, subfamily a, member 4 (Smarca4) | -1.6348 | 5.70E-04 | 0.0392 |
| Cc2d1b        | coiled-coil and C2 domain containing 1B (Cc2d1b)                                                            | -1.6346 | 3.83E-04 | 0.0317 |
| 9530077C05Rik | RIKEN cDNA 9530077C05 gene (9530077C05Rik)                                                                  | -1.6173 | 2.31E-04 | 0.0256 |
| Parp8         | poly (ADP-ribose) polymerase family, member 8 (Parp8)                                                       | -1.6172 | 7.29E-05 | 0.0127 |
| Enpp1         | ectonucleotide pyrophosphatase/phosphodiesterase 1 (Enpp1)                                                  | -1.6124 | 3.72E-04 | 0.0316 |
| Sft2d2        | SFT2 domain containing 2 (Sft2d2)                                                                           | -1.6095 | 2.59E-04 | 0.0271 |
| LOC675228     | PREDICTED: Mus musculus similar to vacuolar ATPase subunit F (LOC675228)                                    | -1.5997 | 2.10E-04 | 0.0248 |
| Ffar2         | free fatty acid receptor 2 (Ffar2)                                                                          | -1.5953 | 6.18E-05 | 0.0120 |
| Xrcc6         | X-ray repair complementing defective repair in Chinese hamster cells 6 (Xrcc6)                              | -1.5828 | 5.18E-04 | 0.0383 |
| Lck           | lymphocyte protein tyrosine kinase (Lck)                                                                    | -1.5824 | 2.72E-05 | 0.0095 |
| Msh5          | mutS homolog 5 (E. coli) (Msh5)                                                                             | -1.5785 | 1.22E-04 | 0.0180 |
| Epsti1        | epithelial stromal interaction 1 (breast) (Epsti1), transcript variant a                                    | -1.5781 | 3.18E-04 | 0.0308 |
| Dusp6         | dual specificity phosphatase 6 (Dusp6)                                                                      | -1.5771 | 3.22E-04 | 0.0308 |
| Col18a1       | procollagen, type XVIII, alpha 1 (Col18a1)                                                                  | -1.5710 | 2.31E-04 | 0.0256 |
| Fmnl3         | formin-like 3 (Fmnl3)                                                                                       | -1.5701 | 1.31E-04 | 0.0186 |
| Slamf9        | SLAM family member 9 (Slamf9)                                                                               | -1.5673 | 5.85E-04 | 0.0397 |
| Ulk1          | Unc-51 like kinase 1 (C. elegans) (Ulk1)                                                                    | -1.5634 | 6.61E-04 | 0.0430 |
| Itgad         | integrin, alpha D (Itgad)                                                                                   | -1.5609 | 3.33E-04 | 0.0309 |
| St8sia4       | ST8 alpha-N-acetyl-neuraminide alpha-2,8-sialyltransferase 4 (St8sia4)                                      | -1.5571 | 2.15E-05 | 0.0088 |

|               |                                                                    |         |          |        |
|---------------|--------------------------------------------------------------------|---------|----------|--------|
| Csrp2         | cysteine and glycine-rich protein 2 (Csrp2)                        | -1.5460 | 7.56E-04 | 0.0451 |
| Tap1          | transporter 1, ATP-binding cassette, sub-family B (MDR/TAP) (Tap1) | -1.5434 | 8.62E-04 | 0.0469 |
| Zfp428        | zinc finger protein 428 (Zfp428)                                   | -1.5410 | 2.68E-05 | 0.0095 |
| BC057627      | cDNA sequence BC057627 (BC057627)                                  | -1.5392 | 3.93E-04 | 0.0318 |
| Bhlhb2        | basic helix-loop-helix domain containing, class B2 (Bhlhb2)        | -1.5344 | 5.81E-04 | 0.0396 |
| Pard6g        | par-6 partitioning defective 6 homolog gamma (C. elegans) (Pard6g) | -1.5199 | 5.43E-04 | 0.0383 |
| 4933428G20Rik | RIKEN cDNA 4933428G20 gene (4933428G20Rik)                         | -1.5132 | 3.76E-04 | 0.0316 |
| Gstp2         | glutathione S-transferase, pi 2 (Gstp2)                            | -1.5036 | 3.75E-05 | 0.0108 |
| Rnf31         | ring finger protein 31 (Rnf31)                                     | -1.5007 | 8.52E-05 | 0.0141 |
